# Supplementary material
Source: PubMed Central journal article supplement (PMC4054296)
Supplement: MCB.01674-13_zmb999100452so1.pdf [file MCB.01674-13_zmb999100452so1.pdf]

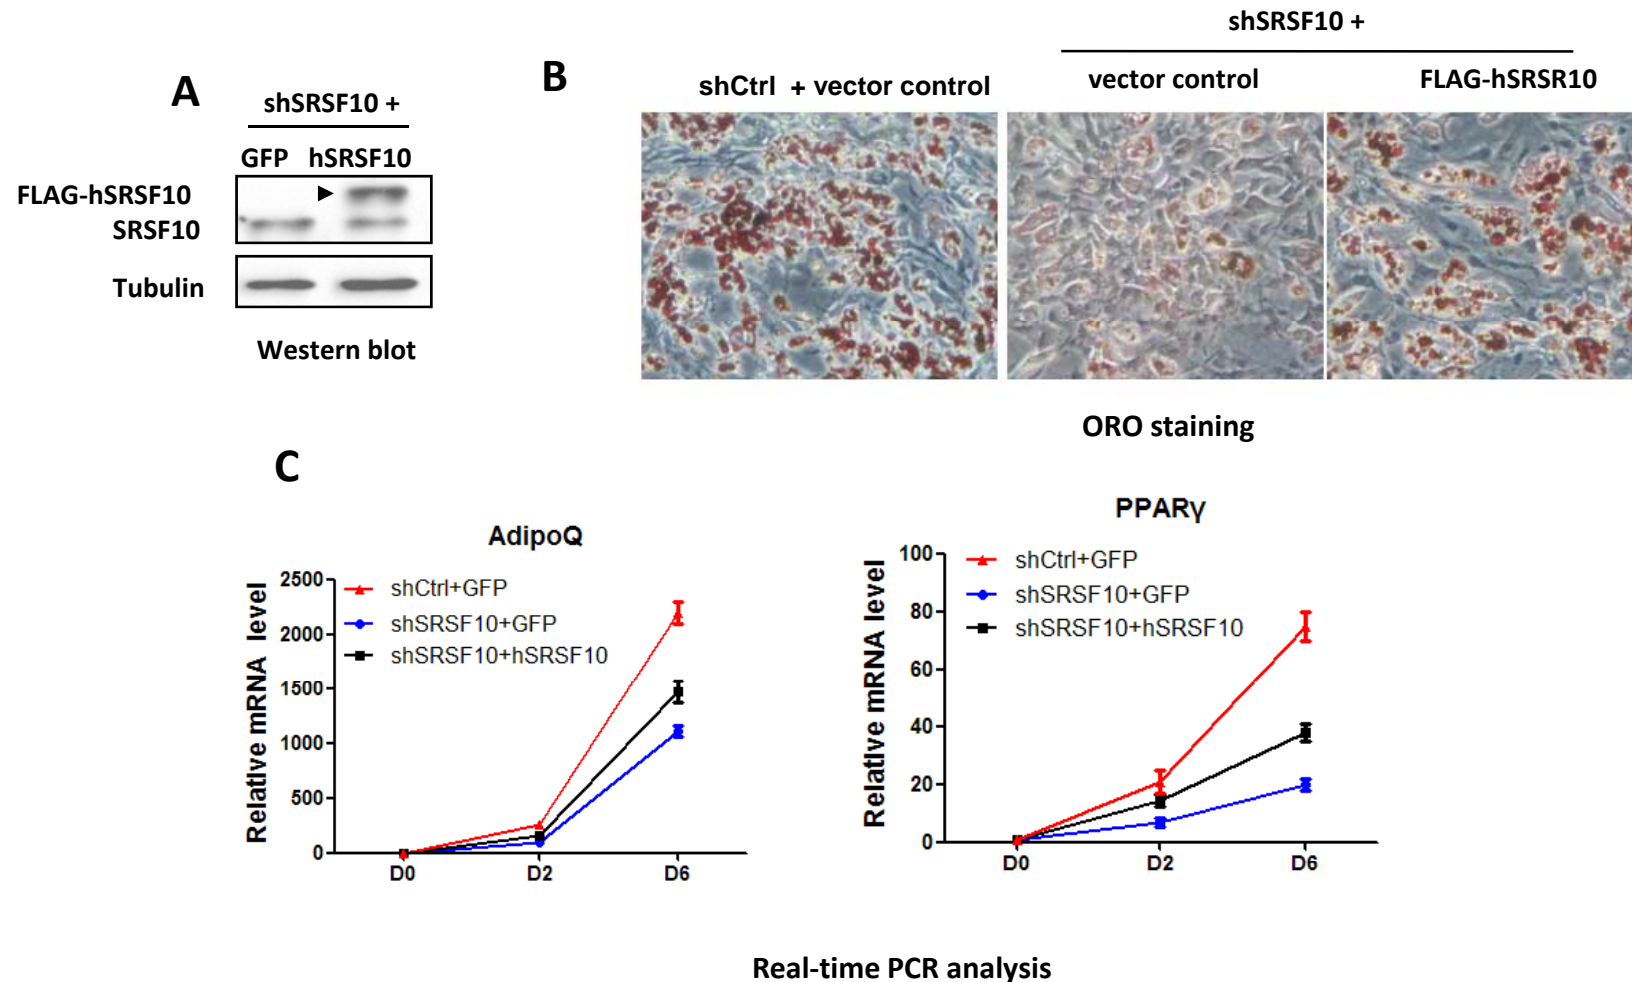

Supplemental Fig. S1. Ectopic expression of human SRSF10 could partially rescue the defective adipogenesis of the shSRSF10 /C3H10T1/2 cells. (A) shSRSF10 C3H10T1/2 cells were infected with retroviruses encoding either human SRSF10 (hSRSF10) or green fluorescent protein (GFP). As comparison, shCtrl C3H10T1/2 cells were also infected with GFP-containing retroviruses. The ectopic expression of FLAG tagged human SRSF10 was confirmed by immunoblotting using SRSF10 antibody. Position of FLAG-hSRSF10 is indicated by an arrow. (B) Hormone-induced adipogenesis of shCtrl-GFP, shSRSF10-hSRSF10 and shSRSF10-GFP C3H10T1/2 cells, as assessed by ORO staining. (C) RNAs were extracted from shCtrl-GFP, shSRSF10-hSRSF10 or shSRSF10-GFP C3H10T1/2 cells at indicated days. Relative mRNA of PPAR $\gamma$  (left) or adipoQ (right) was measured as described in Figure 2B.

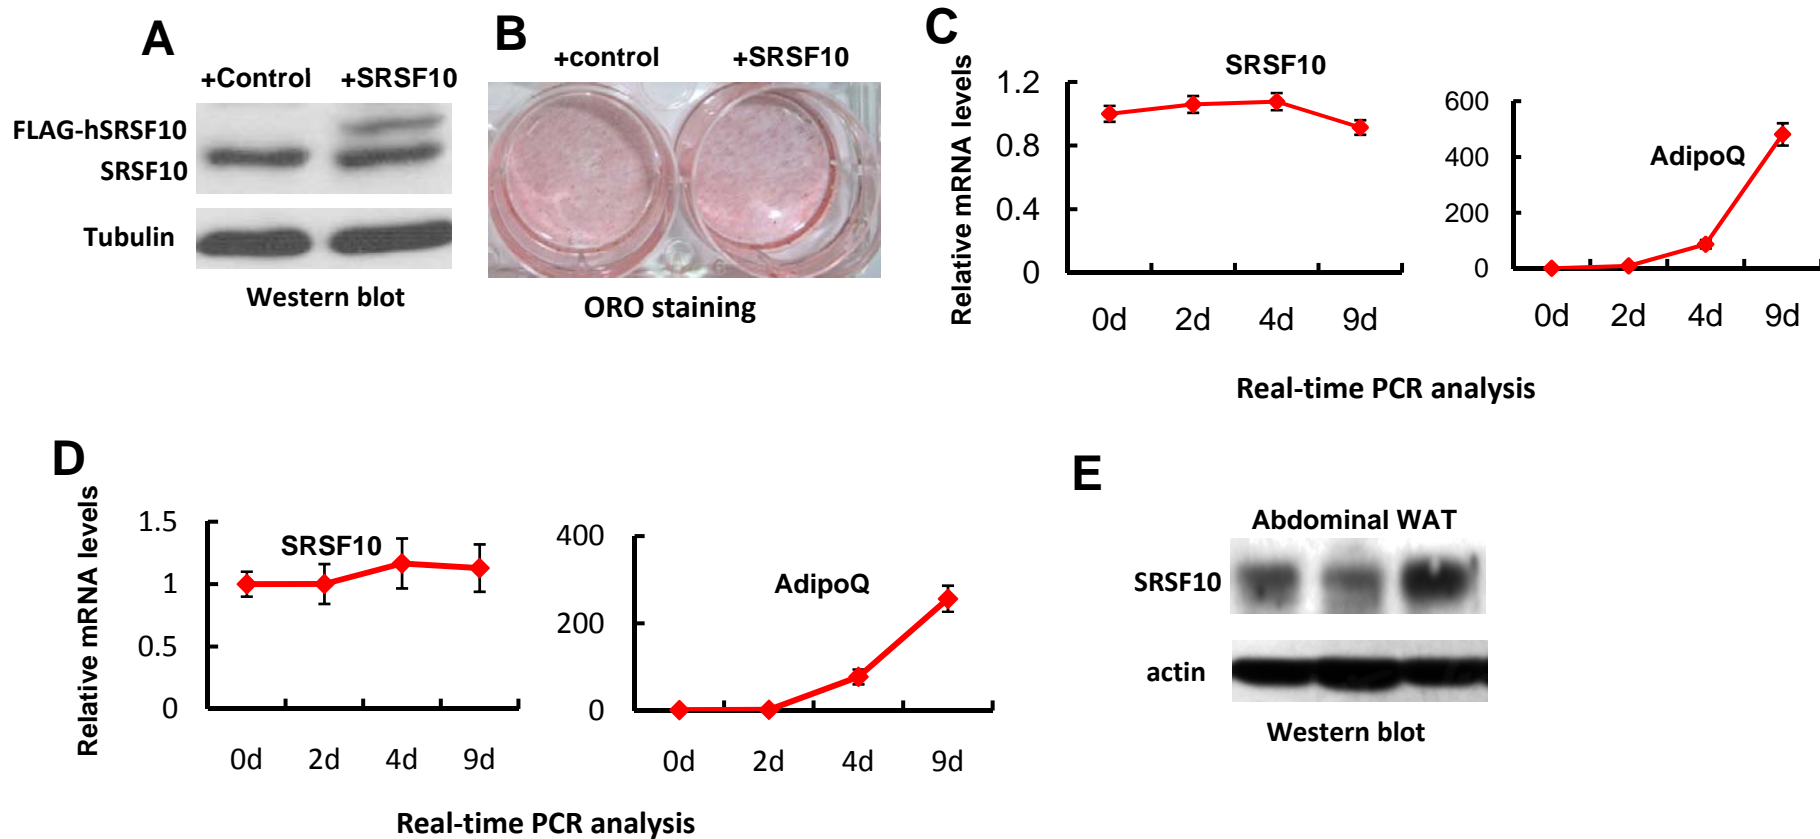

Supplemental Fig. S2. Wild-type amount of SRSF10 is enough to drive C3H10T1/2 cells to differentiate. (A) C3H10T1/2 cells were infected with retroviruses encoding either human SRSF10 (hSRSF10) or empty vector. The ectopic expression of FLAG tagged human SRSF10 was confirmed by immunoblotting. (B) Hormone-induced adipogenesis of cells described in A, as assessed by ORO staining. (C) RNAs were extracted from wild-type MEF cells at indicated differentiation days. Relative mRNA of SRSF10 (left) or adipoQ (right) was measured as described in Figure 2B. (D) RNAs were extracted from wild-type C3H10T1/2 cells at indicated differentiation days. Relative mRNA of SRSF10 (left) or adipoQ (right) was measured as described in Figure 2B. (E) SRSF10 was expressed in abdominal WAT of adult mice. Abdominal WAT was isolated from three adult B6 mice, respectively and subjected to western blot using indicated antibodies.

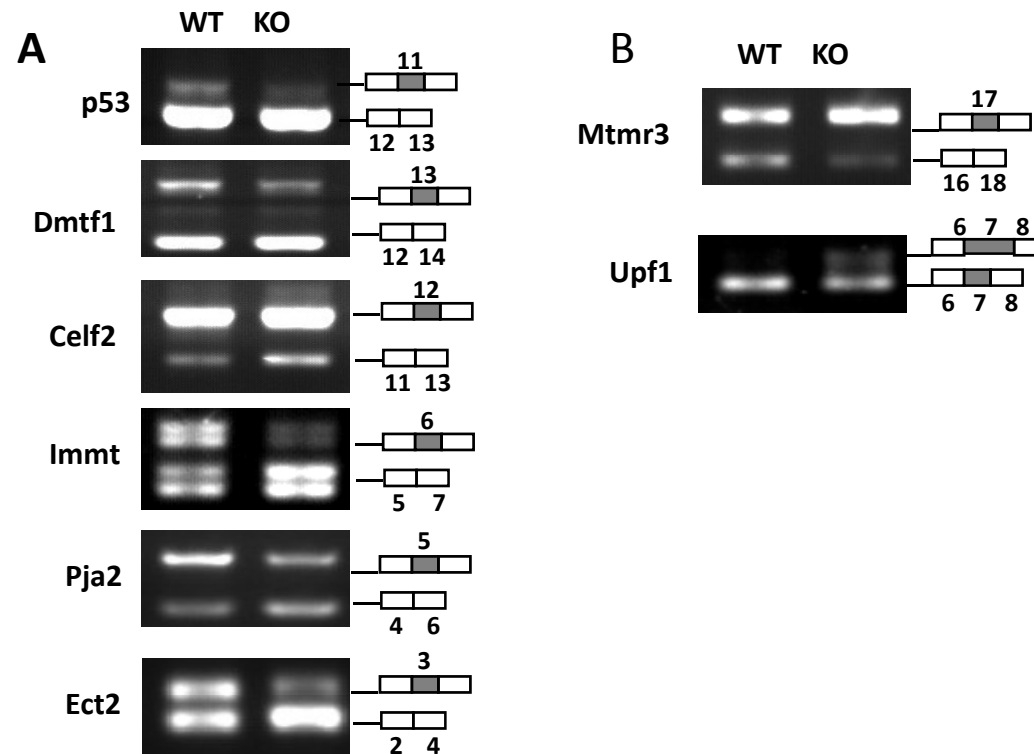

Supplemental Fig. S3. SRSF10 depletion causes both exon inclusion and exclusion *in vivo*. (A) Examples of SRSF10-dependent exon inclusion. Indicated transcripts containing alternatively spliced exons were analyzed by RT-PCR using RNAs extracted from WT and KO MEF cells, respectively. RNA products are indicated schematically on the left. (B) Examples of SRSF10-dependent exon exclusion were analyzed as described in (A).

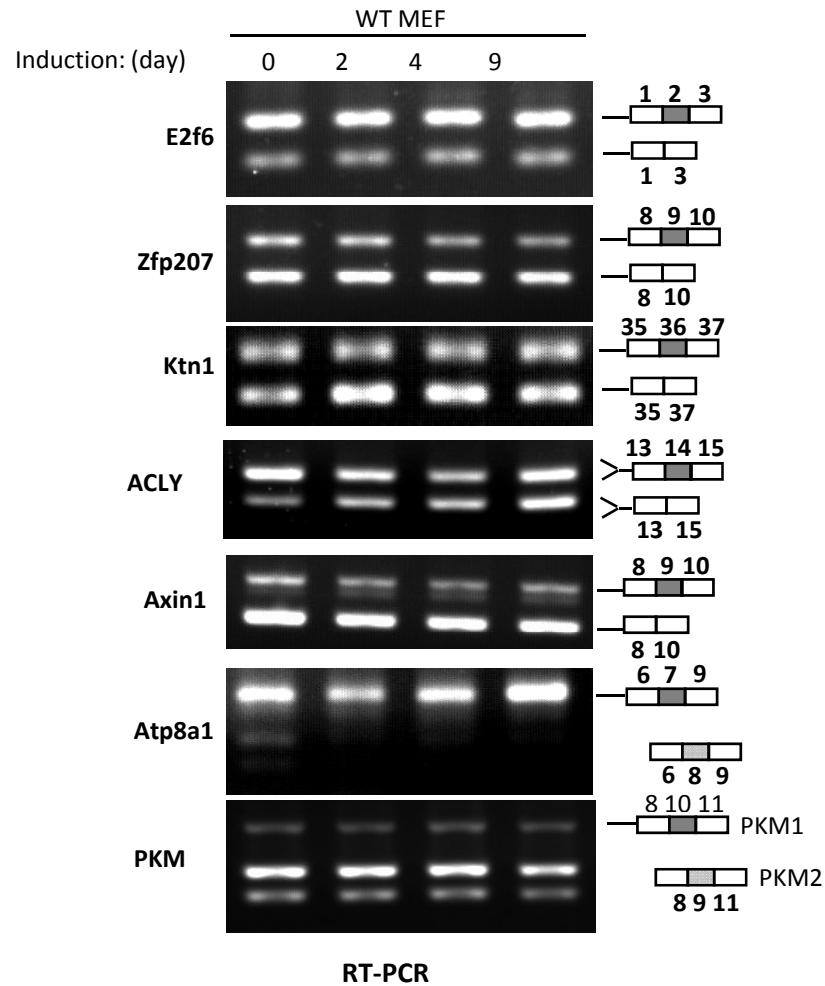

Supplemental Fig. S4. Expression pattern of SRSF10- regulated splicing events during adipogenesis. Wild type primary MEF cells were induced to differentiate by using hormone cocktail. RNA samples were collected at indicated times and analyzed by RT-PCR. RNA products are indicated schematically on the right.

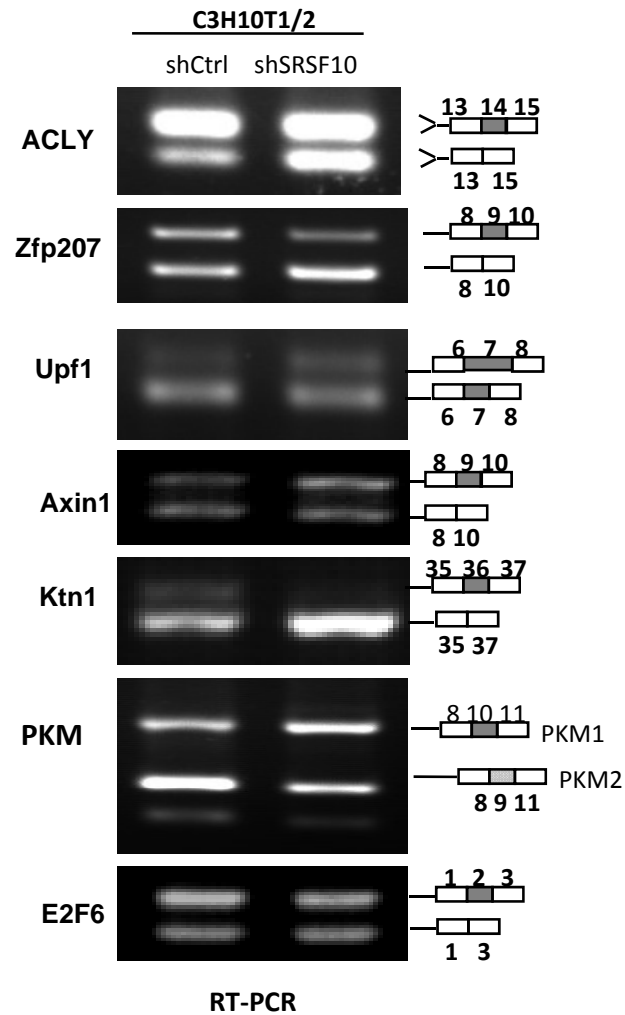

Supplemental Fig. S5. Splicing changes of SRSF10-validated genes in KO MEF cells were also observed in C3H10T1/2 cells upon SRSF10 knockdown. Total RNA was extracted from shCtrl and shSRSF10 C3H10T1/2 cells, respectively and subjected to RT-PCR analysis as described in Figure 3.

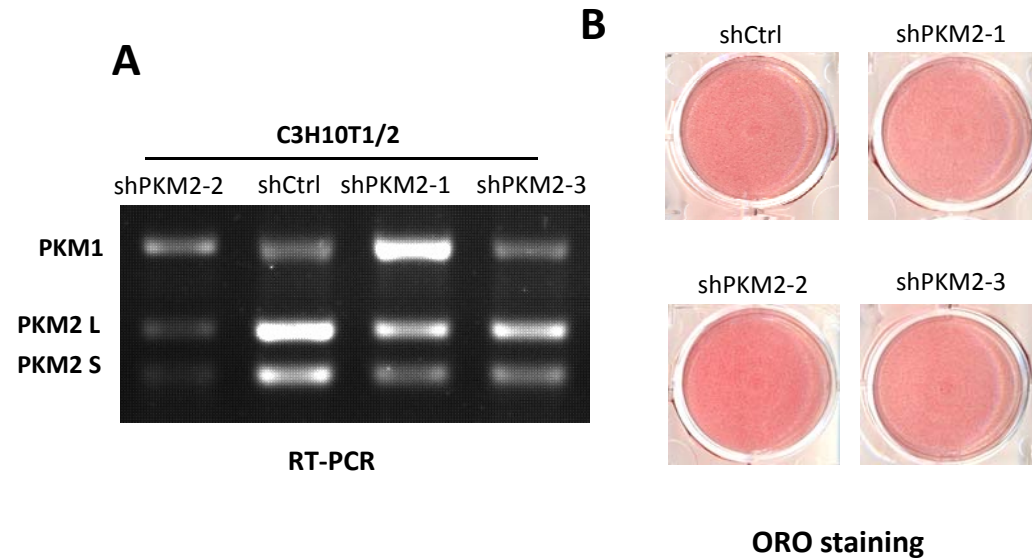

Supplemental Fig. S6. Changes in PKM splice variants did not alter adipogenesis. (A) C3H10T1/2 cells were infected with retroviruses expressing either PKM2-specific shRNAs (shPKM2-1/2/3) or control shRNA (shCtrl) and then selected for puromycin resistance. RNA samples were collected from the selected cells and PKM2 knockdown efficiency was determined by RT-PCR following Pst I digestion. (B) shPKM2-1/2/3 and shCtrl C3H10T1/2 cells were induced to differentiate by using hormone cocktail. 6 days post induction, cells were stained by ORO.

### Supplemental Table S1. Oligo Sequence Information

#### For plasmid construction

|                       |                                   |
|-----------------------|-----------------------------------|
| Lipin1-mini-F-HindIII | CCCaagcttAACTCTTCCTAATGATGTACCACC |
| Lipin1-mini-R-XhoI    | CGGctcgagCAGCCTGTGGCAATTCACC      |
| Lipin1-CMV14-F-EcoRI  | CGgaattcATGAATTACGTGGGGCAGC       |
| Lipin1-CMV14-R-KpnI   | CGGggtaccGCTGAGGCTGAATGCATG       |
| Lipin1-E7-F-HindIII   | cccAAGCTTCAGCCTGGTAGATTGCCA       |
| Lipin1-E7-R-BamHI     | cgGGATCCCTTTCCGAAGCATGGAAGTGG     |
| Lipin1-E8-F-HindIII   | ctcAAGCTTTCCTTCAGGCTCCCGGC        |
| Lipin1-E8-R-BamHI     | cgGGATCCCTTTGCAGCCTGTGGCAATTC     |

#### For shRNA overexpressing constructs

|          |                                                                                                                                                                                                                                           |
|----------|-------------------------------------------------------------------------------------------------------------------------------------------------------------------------------------------------------------------------------------------|
| shCtrl   | GATCCTTCTCCGAACGTGTCACGTTTCAAGAGA<br>ACGTGACACGTTCCGGAGAATTTTTTGCTAGCG<br>GATCCGGAAGACACCAAATCAAATGATTCAAGA<br>GATCATTTGATTTGGTGTCTTCCTTTTTTGCTAG<br>CG                                                                                   |
| shSRSF10 | GATCCGCTTGCAGCTATTCGAGGAATTCAAGAG<br>ATTCCTCGAATAGCTGCAAGTTTTTTGCTAGCG<br>GATCCGCCATTATCGTGCTACCAATTCAAGAG<br>ATTGGTGAGCACGATAATGGTTTTTTGCTAGCG<br>GATCCGCCATCTACCACTTGCAGCTATTCGATTC<br>AAGAGATCGAATAGCTGCAAGTGGTAGATGGTT<br>TTTTGCTAGCG |
| shPKM2-1 |                                                                                                                                                                                                                                           |
| shPKM2-2 |                                                                                                                                                                                                                                           |
| shPKM2-3 |                                                                                                                                                                                                                                           |

#### For site directed mutagenesis

|                                       |                                                                                                       |
|---------------------------------------|-------------------------------------------------------------------------------------------------------|
| Lipin1-mini- $\Delta$ E6-F            | TAAACTTAAGCTTTGGTCCCCCAGCC<br>GAGGGTTTTGAAGTCAGCTATAATTCGTTTAAAC                                      |
| Lipin1-mini- $\Delta$ I6-F            | TGACTGTGAC                                                                                            |
| Lipin1-mini- $\Delta$ E7-F            | GTGCCTCCAGCAGCTCTCTAGCTCTTG                                                                           |
| Lipin1-mini- $\Delta$ I7-F            | CAATCACTTGCAATCAAAGGTTTTTTTATT                                                                        |
| Lipin1-mini- $\Delta$ E8-F            | CTTCAGGCTCCCGCTCGAGTCTAGAG                                                                            |
| Lipin1-mini- $\Delta$ E8-SRSF10<br>-F | GTCCTTCAGGCTCCCGAAAGACAAAAAAGACAA<br>AAAAGACAAACTCGAGTCTAGAGGGC<br>GTCCTTCAGGCTCCCGTCCCCCTCACCTGGCCGA |
| Lipin1-mini- $\Delta$ E8-NTC-F        | GGGAGTTCTCTCGAGTCTAGAGGGC                                                                             |

#### For minigene analysis

|           |                         |
|-----------|-------------------------|
| Lipin1-F1 | ATACGACTCACTATAGGGAGACC |
| Lipin1-R1 | GCCAGAGCATTTCAGGTTA     |
| Lipin1-F2 | TCCAGTTCGGACAGAGAAT     |
| Lipin1-R2 | GCTGGCAACTAGAAGGCAC     |

### For RT-PCR and qPCR

|                  |                          |
|------------------|--------------------------|
| Zfp207-F         | TTCCTCCAATGACTCAAG       |
| Zfp207-R         | CTGTAGACTGTGTATAAGC      |
| Ktn1-F           | GGAGCAAGAAGAAAGTAAATGG   |
| Ktn1-R           | TGCAACTCAGTCAACAGATC     |
| Immt-F           | CTGCCTGTGGCACAGAGCC      |
| Immt-R           | CAGTATGTTGGAGTGTG        |
| Lipin1-F         | TCCCAGTTCGGACAGAGAAT     |
| Lipin1-R         | GCCAGAGCATTTCAGGTTA      |
| Axin1-F          | ATGGGTCTTCTGGGTGA        |
| Axin1-R          | CTGCCTTTCTTTGTGATTTT     |
| PKM-F            | CACACAGATGCTGGAGAG       |
| PKM-R            | GCCAAGTTTACACGAAGG       |
| Atp8a1-F         | AAGGCTGATAATGCTGTGAAC    |
| Atp8a1-R         | TCGTAGAGATGTCCGGTTTGG    |
| CEBPa-F          | GAACAGCAACGAGTACCGGGTA   |
| CEBPa-R          | CCCATGGCCTTGACCAAGGAG    |
| aP2-F            | GATGCCTTTGTGGGAACCTG     |
| aP2-R            | TCCTGTCGTCTGCGGTGATT     |
| AdipoQ-F         | GGAACTTGTGCAGGTTGGAT     |
| AdipoQ-R         | GCTTCTCCAGGCTCTCCTTT     |
| PPAR $\gamma$ -F | CTCCTGTTGACCCAGAGCAT     |
| PPAR $\gamma$ -R | AATGCGAGTGGTCTTCCATC     |
| 36B4-F           | TAAAGACTGGAGACAAGGTGGGAG |
| 36B4-R           | AGAAAGCGAGAGTGCAGGGC     |



**Supplemental Table S2: List of significantly changed splicing events regulated by SRSF10**

|                    |               |               |       |          |
|--------------------|---------------|---------------|-------|----------|
| ENSMUSG00000053070 | 9230110C19Rik | Cassette exon | -0.66 | 9.22E+18 |
| ENSMUSG00000028560 | Usp1          | Cassette exon | -0.66 | 9.22E+18 |
| ENSMUSG00000020917 | Acly          | Cassette exon | 0.66  | 9.22E+18 |
| ENSMUSG00000020070 | Rufy2         | A3SS          | -0.65 | 125.15   |
| ENSMUSG00000028560 | Usp1          | Cassette exon | -0.63 | 9.22E+18 |
| ENSMUSG00000057406 | Whsc1         | Cassette exon | 0.57  | 13763.43 |
| ENSMUSG00000004980 | Hnrnpa2b1     | A5SS          | -0.57 | 126.72   |
| ENSMUSG00000025893 | Kbtbd3        | Cassette exon | -0.53 | 285.04   |
| ENSMUSG00000031488 | Rab11fip1     | Cassette exon | 0.51  | 10.69    |
| ENSMUSG00000038344 | Txlng         | RI            | 0.51  | 3.58     |
| ENSMUSG00000063889 | Crem          | Cassette exon | -0.5  | 19.3     |
| ENSMUSG00000022884 | Eif4a2        | Cassette exon | -0.49 | 152.55   |
| ENSMUSG00000062822 | 4833420G17Rik | Cassette exon | 0.49  | 260.54   |
| ENSMUSG00000029062 | Cdk11b        | Cassette exon | 0.49  | 35.16    |
| ENSMUSG00000025185 | Loxl4         | A3SS          | 0.49  | 11.03    |
| ENSMUSG00000074129 | Rpl13a        | RI            | -0.49 | 11.11    |
| ENSMUSG00000024073 | Birc6         | A5SS          | -0.48 | 13.95    |
| ENSMUSG00000051149 | Adnp          | Cassette exon | -0.47 | 3.02E+10 |
| ENSMUSG00000057469 | E2f6          | Cassette exon | 0.47  | 38.92    |
| ENSMUSG00000030811 | Fbxl19        | A5SS          | -0.47 | 32.58    |
| ENSMUSG00000021236 | Entpd5        | Cassette exon | -0.46 | 14.44    |
| ENSMUSG00000021843 | Ktn1          | Cassette exon | -0.46 | 11.45    |
| ENSMUSG00000028229 | Fam82b        | Cassette exon | 0.46  | 13.43    |
| ENSMUSG00000020593 | Lipin1        | Cassette exon | -0.46 | 76.64    |
| ENSMUSG00000022425 | Enpp2         | Cassette exon | -0.45 | 12.13    |
| ENSMUSG00000024943 | Smc5          | A5SS          | 0.44  | 13.05    |
| ENSMUSG00000030272 | Camk1         | RI            | 0.44  | 12.34    |
| ENSMUSG00000009585 | Apobec3       | Cassette exon | -0.43 | 34.9     |
| ENSMUSG00000032570 | Atp2c1        | Cassette exon | -0.43 | 14.42    |
| ENSMUSG00000026455 | Klhl12        | A3SS          | -0.43 | 11.19    |
| ENSMUSG00000022364 | Wdr67         | Cassette exon | -0.42 | 56.61    |
| ENSMUSG00000004980 | Hnrnpa2b1     | Cassette exon | -0.41 | 9.22E+18 |
| ENSMUSG00000030516 | Tjp1          | A5SS          | 0.4   | 20.56    |
| ENSMUSG00000032103 | Pus3          | RI            | 0.4   | 64       |
| ENSMUSG00000058301 | Upf1          | Cassette exon | 0.4   | 20.56    |
| ENSMUSG00000000326 | Comt          | Cassette exon | -0.39 | 9.22E+18 |
| ENSMUSG00000032580 | Rbm5          | Cassette exon | -0.39 | 13780.65 |
| ENSMUSG00000020250 | Txnrd1        | Cassette exon | 0.39  | 34.56    |
| ENSMUSG00000052337 | Immt          | Cassette exon | -0.37 | 9.22E+18 |
| ENSMUSG00000032410 | Xrn1          | A5SS          | -0.37 | 42.59    |
| ENSMUSG00000027342 | Pcna          | A5SS          | -0.36 | 9.22E+18 |
| ENSMUSG00000049295 | Zfp219        | Cassette exon | -0.35 | 36.38    |
| ENSMUSG00000052915 | Msl1          | Cassette exon | 0.35  | 85.12    |
| ENSMUSG00000040669 | Phc1          | Cassette exon | 0.35  | 64.36    |
| ENSMUSG00000027684 | Mecom         | A3SS          | -0.35 | 1.03E+13 |
| ENSMUSG00000063802 | Hspbp1        | A3SS          | -0.35 | 56.6     |
| ENSMUSG00000028999 | Rint1         | Cassette exon | -0.34 | 293.11   |
| ENSMUSG00000035863 | Palm          | Cassette exon | 0.34  | 756.6    |
| ENSMUSG00000059552 | p53           | Cassette exon | 0.34  | 23.73    |
| ENSMUSG00000002409 | Dyrk1b        | A3SS          | 0.34  | 22.59    |
| ENSMUSG00000036564 | Ndrg4         | Cassette exon | 0.33  | 11.35    |
| ENSMUSG00000040325 | Vprbp         | Cassette exon | 0.33  | 11.15    |
| ENSMUSG00000064105 | Cnm2          | Cassette exon | -0.32 | 14.06    |

|                     |               |               |       |            |
|---------------------|---------------|---------------|-------|------------|
| ENSMUSG00000063802  | Hspbp1        | A3SS          | -0.32 | 13.02      |
| ENSMUSG00000029141  | Slc4alap      | Cassette exon | -0.31 | 29.31      |
| ENSMUSG00000084504  | IFColec12     | Cassette exon | 0.31  | 82.34      |
| ENSMUSG00000003680  | IFTaf61       | Cassette exon | 0.31  | 39.5       |
| ENSMUSG000000035401 | 2210018M11Rik | A3SS          | -0.31 | 11.11      |
| ENSMUSG00000005506  | Celf1         | Cassette exon | -0.3  | 4.20E+14   |
| ENSMUSG00000021843  | Ktn1          | Cassette exon | 0.3   | 32.14      |
| ENSMUSG00000034518  | Hmgxb4        | Cassette exon | 0.3   | 6.84       |
| ENSMUSG00000027639  | Samhd1        | Cassette exon | 0.3   | 38132.25   |
| ENSMUSG00000027699  | Ect2          | Cassette exon | 0.3   | 1.49E+14   |
| ENSMUSG00000042508  | Dmtf1         | Cassette exon | -0.29 | 8.13       |
| ENSMUSG00000006418  | Rnf114        | Cassette exon | 0.29  | 53.98      |
| ENSMUSG00000022892  | App           | Cassette exon | -0.28 | 1.00E+12   |
| ENSMUSG00000037697  | Ddhd1         | Cassette exon | -0.28 | 28.97      |
| ENSMUSG00000062901  | Klh124        | Cassette exon | -0.28 | 18.83      |
| ENSMUSG00000002984  | Tomm40        | RI            | -0.28 | 24.58      |
| ENSMUSG00000028552  | Eps15         | Cassette exon | -0.27 | 2.02E+11   |
| ENSMUSG00000063179  | Pstk          | Cassette exon | -0.27 | 51.44      |
| ENSMUSG00000037685  | ATP8a1        | MXE           | -0.27 | 3.7        |
| ENSMUSG00000037536  | Fbxo34        | Cassette exon | 0.26  | 33.36      |
| ENSMUSG00000066037  | Hnrnpr        | Cassette exon | 0.26  | 45.67      |
| ENSMUSG00000024182  | Axin1         | Cassette exon | -0.26 | 43.67      |
| ENSMUSG00000026305  | Lrrfip1       | Cassette exon | 0.25  | 31.29      |
| ENSMUSG00000019795  | Pcmt1         | A5SS          | 0.25  | 37.01      |
| ENSMUSG00000042605  | Atxn2         | Cassette exon | -0.24 | 8216535.25 |
| ENSMUSG00000033819  | Ppp1r16a      | Cassette exon | -0.24 | 15.82      |
| ENSMUSG00000025278  | Flnb          | Cassette exon | 0.24  | 78.87      |
| ENSMUSG00000024083  | Pja2          | Cassette exon | 0.24  | 429.16     |
| ENSMUSG00000041231  | Ublcp1        | A3SS          | -0.24 | 2467.96    |
| ENSMUSG00000024483  | Ankhd1        | A3SS          | -0.24 | 322.76     |
| ENSMUSG00000027210  | Meis2         | Cassette exon | -0.23 | 21.65      |
| ENSMUSG00000027593  | IFRaly        | Cassette exon | -0.23 | 9.22E+18   |
| ENSMUSG00000007880  | Arid1a        | A5SS          | -0.23 | 14.91      |
| ENSMUSG00000038866  | Zcchc2        | RI            | 0.23  | 76.05      |
| ENSMUSG00000054426  | A930005H10Rik | Cassette exon | 0.22  | 88.27      |
| ENSMUSG00000029106  | Add1          | Cassette exon | 0.22  | 618.2      |
| ENSMUSG00000029505  | Ep400         | Cassette exon | 0.22  | 343.75     |
| ENSMUSG00000078713  | Tomm5         | Cassette exon | 0.22  | 9.22E+18   |
| ENSMUSG00000034354  | Mtmr3         | Cassette exon | -0.22 | 3.73E+07   |
| ENSMUSG00000020831  | 0610010K14Rik | A5SS          | 0.22  | 180.54     |
| ENSMUSG00000007850  | Hnrnph1       | RI            | 0.22  | 33.13      |
| ENSMUSG00000017421  | Zfp207        | Cassette exon | -0.21 | 9.22E+18   |
| ENSMUSG00000068580  | Zfyve19       | Cassette exon | -0.21 | 33.87      |
| ENSMUSG00000006498  | Ptbp1         | Cassette exon | 0.21  | 24947.64   |
| ENSMUSG00000032294  | PKM           | MXE           | 0.21  | 27.82      |
| ENSMUSG00000002107  | Celf2         | Cassette exon | -0.2  | 4.33E+07   |
| ENSMUSG00000024571  | IFTxn14a      | Cassette exon | 0.2   | 18.93      |
